# Supplementary material
Source: Frontiers journal article supplement (https://www.frontiersin.org/articles/99711)
Supplement: Data_Sheet_1.DOCX [file Data_Sheet_1.DOCX]

# Appendage 1

Genera included in the track analysis, and their assignations to floras from the cluster analysis.

Lowland forest flora

*Airyantha, Allanblackia, Anisopus, Anisosepalum, Anthocleista, Aoranthe, Apodiscus, Aptandra, Ardisia, Atroxima, Bafodeya, Begonia, Buchnerodendron, Byrsanthus, Byttneria, Calycosiphonia, Carpolobia, Chidlowia, Chrysobalanus, Cnestis, Connarus, Crossostemma, Crotonogynopsis, Cyclocotyla, Cylindropsis, Decorsella, Desbordesia, Dewevrella, Dichapetalum, Dictyophleba, Diospyros, Endodesmia, Farquharia, Fegimanra, Funtumia, Garcinia, Globimetula, Gymnostemon, Haplormosia, Hemandradenia, Holarrhena, Hutchinsonia, Hymenocoleus, Irvingia, Isonema, Ixora, Jollydora, Keayodendron, Lasiodiscus, Lebrunia, Leucomphalos, Licania, Lindernia, Lophira, Maesopsis, Magnistipula, Malouetia, Manotes, Maranthes, Martretia, Maschalocephalus, Michelsonia, Microcoelia, Milicia, Monocyclanthus, Mostuea, Motandra, Necepsia, Neocarya, Nothospondias, Oberonia, Octolepis, Oncinotis, Paramacrolobium, Parapentas, Pararistolochia, Parinari, Penianthus, Pentadesma, Petersianthus, Petitiocodon, Phragmanthera, Pierreodendron, Pleioceras, Pleiocoryne, Poggea, Pogonophora, Polystemonanthus, Preussiodora, Pseudoprosopis, Pycnobotrya, Rhodognaphalon, Robynsia, Sacoglottis, Schefflera, Selaginella, Sphenocentrum, Spigelia, Spondianthus, Staurogyne, Strophanthus, Strychnos, Tapura, Trema, Tricalysia, Triphyophyllum, Usteria, Vahadenia, Voacanga, Zenkerella.*

Tropic-montane flora

*Adenium, Ansellia, Arceuthobium, Barbeya, Blaeria, Bottegoa, Capsella, Carphalea, Carvalhoa, Caucalis, Cephalosphaera, Colpodium, Cometes, Craterostigma, Cryptotaenia, Cussonia, Deschampsia, Dombeya, Ellipanthus, Embelia, Emelianthe, Endostemon, Englerina, Erianthemum, Hagenia, Haplocoelopsis, Helixanthera, Hirtella, Hypericum, Impatiens, Korthalsella, Lecaniodiscus, Lettowianthus, Linociera, Maesa, Mesogyne, Najas, Olea, Oliverella, Oncella, Oncocalyx, Paederia, Pedistylis, Peucedanum, Phaenanthoecium, Polyscias, Reichardia, Rourea, Saba, Schizozygia, Scorodophloeus, Scrophularia, Snowdenia, Spragueanella, Vismia, Vismianthus.*

Savanna flora

*Aizoanthemum, Anticharis, Antiphiona, Arthraerua, Augea, Blepharis, Chaetobromus, Crotalaria, Cucumella, Dyerophytum, Ectadium, Forsskaolea, Juttadinteria, Kaokochloa, Kirkia, Lavrania, Manuleopsis, Namacodon, Namibia, Ondetia, Peristrophe, Phlyctidocarpa, Sisyndite, Tapinanthus.*

Austro-temperate flora

*Acampe, Acrolophia, Agelanthus, Alberta, Anacampseros, Anthochortus, Anthospermum, Askidiosperma, Aulax, Bartholina, Bartsia, Bonatea, Brabejum, Brownleea, Buddleja, Calanthe, Calopsis, Cannomois, Carpacoce, Ceratandra, Ceratocaryum, Chondropetalum, Corycium, Cyanella, Cynanchum, Diastella, Disa, Elegia, Emex, Euchaetis, Evotella, Galium, Galopina, Gomphostigma, Herschelianthe, Huttonaea, Hydrophilus, Hyparrhenia, Hypodiscus, Ischyrolepis, Lachnagrostis, Leucadendron, Leucospermum, Mastersiella, Metalasia, Mimetes, Monadenia, Monsonia, Moquiniella, Moraea, Mystacidium, Nenax, Nevillea, Nuxia, Orobanche, Pachites, Pachycarpus, Paranomus, Pentaschistis, Platycaulos, Protea, Ptaeroxylon, Pterygodium, Restio, Retzia, Rhodocoma, Schizochilus, Schizodium, Seemannaralia, Septulina, Serruria, Sorocephalus, Spatalla, Staberoha, Stenoglottis, Thamnochortus, Vexatorella, Viscum, Watsonia, Willdenowia, Xiphotheca, Zygophyllum.*

Unassigned

*Actinanthella, Alhagi, Anastatica, Anogeissus, Batopedina, Berhautia, Burttia, Calligonum, Caulinia, Chamaeclitandra, Crateva, Crepidorhopalon, Cressa, Crypsis, Eminia, Faroa, Guiera, Jodrellia, Lasiurus, Louisiella, Mayaca, Melanocenchris, Mitragyna, Mitreola, Nucularia, Ochthochloa, Otiophora, Philenoptera, Pseudocedrela, Rogeria, Schouwia, Securidaca, Sericanthe, Solenostemma, Thecorchus, Urochondra, Vanwykia.*

# Appendage 2

Appendix 2: Clades, ages and references used in the analysis of the age and diversification rates of the African floras.

| Clade | Flora | Crown age | Stem age | Richness | Sister Region | Reference | Notes |
| --- | --- | --- | --- | --- | --- | --- | --- |
| *Coccinia* | Arid | 2.5 |  | 6 | Africa | ([Holstein and Renner, 2011](#_ENREF_18)) | derived from savanna. |
| *Commiphora* | Arid | 27.8 ⁺₋ 4.5 | 47.5⁺₋4.5 | 150 | Americas | ([Weeks and Simpson, 2007](#_ENREF_42)) | Typical of fire-free arid systems |
| *Cyphostemma* | Arid | 34.3 (22.3-47.0) |  | 106 | Asia | ([Lu et al., 2013](#_ENREF_26)) |  |
| *Euphorbia* Clade C1 pp | Arid | 5 |  |  | Asia | ([Bruyns et al., 2011](#_ENREF_6)) |  |
| *Euphorbia* Clade C2 pp | Arid | 5 |  |  | South America | ([Bruyns et al., 2011](#_ENREF_6)) |  |
| Moringaceae | Arid | 14.7 |  | 14 | Africa | ([Carvalho and Renner, 2012](#_ENREF_10)) | Sister to Caricaceae, inadequately sampled; indirect dating in Caricaceae paper |
| *Thamnosma* | Arid | 8 (5.3-12.1) |  | 6 | America | ([Thiv et al., 2011](#_ENREF_36)) | Arid Track |
| *Wajira* | Arid | 6(5-7) | 10.7 | 5 |  | ([Thulin et al., 2004](#_ENREF_38)) |  |
| Crocoideae | austro-temperate | 40 |  | 1080 | Australia | ([Goldblatt and Manning, 2008](#_ENREF_15); [Goldblatt et al., 2008](#_ENREF_16)) |  |
| Crotalareae | austro-temperate | 44⁺₋2.3 |  | 497 |  | ([Lavin et al., 2005](#_ENREF_23)) | *Crotalaria* radiated in Savanna |
| Danthonioidaea | austro-temperate | 22 |  | 134 | Africa | ([Linder et al., 2013](#_ENREF_24)) |  |
| *Disa* | austro-temperate | 19.5 (10.2-30) |  | 208 | Africa | ([Bytebier et al., 2010](#_ENREF_8)) | Dating based on [Ramirez et al. (2007)](#_ENREF_32). |
| *Ehrharta* | austro-temperate | 35 | 40.9(31.6-41.3) | 39 | Australia | ([Verboom et al., 2003](#_ENREF_41)) | Age estimate from [Verboom et al. (2009)](#_ENREF_40) |
| *Euphorbia* clade A | austro-temperate | 20 |  |  |  | ([Bruyns et al., 2011](#_ENREF_6)) | Complex story, with stem ages of from the Oligocene |
| *Heliophila* | austro-temperate | 1.5 (0.7-2.5) |  | 80 | Eurasia | ([Mummenhoff et al., 2005](#_ENREF_30)), | This estimate based on [Verboom et al. (2009)](#_ENREF_40) sister is globally distributed Aphragmeae ([Couvreur et al., 2010](#_ENREF_11)) |
| *Indigofera* | austro-temperate | 13.1 |  | 490 | Africa | ([Schrire et al., 2003](#_ENREF_34)) |  |
| Irideae | austro-temperate | 35 |  | 233 | Australia | ([Goldblatt and Manning, 2008](#_ENREF_15); [Goldblatt et al., 2008](#_ENREF_16)) |  |
| *Leucadendrii* | austro-temperate | 30.3 (29.3-39.3) | 37.3(29.3-46.2) | 286 | Australia | ([Sauquet et al., 2009](#_ENREF_33)) | All details well supported |
| *Melianthus* | austro-temperate | 17.2 (5.7-26.8) | 34.0(19.4-56.8) | 8 | African | ([Linder et al., 2006](#_ENREF_25)) | Age estimates from [Verboom et al. (2009)](#_ENREF_40) |
| Mesembryanthemoideae | austro-temperate | 6.2 (3.8-8.7) |  | 1500 | Africa | ([Klak et al., 2004](#_ENREF_20)) |  |
| *Muraltia* | austro-temperate | 10.9 (8.6-16.4) | 18.5(14.1-23.3) | 124 | Africa | ([Forest et al., 2007](#_ENREF_14)) | May have diverged from African *Polygala* species, age estimate from [Verboom et al. (2009)](#_ENREF_40) |
| *Pelargonium* | austro-temperate | 31.9 (15.2-39.2) | 43.0(26.6-52.7) | 293 | Africa | ([Bakker et al., 2005](#_ENREF_2)) | Age estimates from [Verboom et al. (2009)](#_ENREF_40) |
| Proteaea | austro-temperate | 28.2 (20.2-37.1) | 72.7(67.6-77.9) | 159 | Australia | ([Sauquet et al., 2009](#_ENREF_33)) | All details well supported |
| Restionoideae | austro-temperate | 61.3 (31.7-65.4) | 91.5(70.8-106.9) | 350 | Australia | ([Hardy et al., 2008](#_ENREF_17)) | Age estimates from [Verboom et al. (2009)](#_ENREF_40) |
| *Satyrium* | austro-temperate | 14.4 | 31.02 | 109 | African | ([van der Niet et al., 2005](#_ENREF_39)) | Age estimates from [Verboom et al. (2009)](#_ENREF_40) |
| *Scabiosa* | austro-temperate | 1.5 (0.7-2.6) |  | 14 | Eurasia | ([Carlson et al., 2012](#_ENREF_9)) | Afromontane grassland to CFR |
| Tecophilaeaceae | austro-temperate | 42 | 68-69 | 4 | Africa | ([Buerki et al., 2013](#_ENREF_7)) |  |
| Tecophilaeaceae | austro-temperate | 34 |  | 5 | Africa | ([Buerki et al., 2013](#_ENREF_7)) | Embedded in Arid radiation in Africa |
| *Wahlenbergia* | austro-temperate | 23.6 (15.3-45.3) |  | 254 |  | ([Prebble et al., 2011](#_ENREF_31)) | Age of main group, mostly southern Africa, sampling poor. Not sure about the African distribution |
| *Zaluzianskya* | austro-temperate | 3.0 (1.9-4.3) | 4.5(2.8-5.9) | 61 | African | ([Verboom et al., 2009](#_ENREF_40)) | Age estimates from [Verboom et al. (2009)](#_ENREF_40) |
| Zygophylloideae | austro-temperate | 53 (17.1-69.4) |  |  | Asia | ([Bellstedt et al., 2012](#_ENREF_4)) |  |
| *Acridocarpus* | lowland forest | 55 |  | 20 | South America | ([Davis et al., 2002](#_ENREF_13)) | Assuming 5 spp in savanna |
| Annonaceae | lowland forest | 90.4 | 92.98-89 | 448 | Africa | ([Couvreur et al., 2011](#_ENREF_12)) | Stem c. 110 Ma |
| *Begonia* | lowland forest | 22.3 (15.2-29.5) |  | 116 | Hawaii | ([Thomas et al., 2012](#_ENREF_37)) |  |
| *Berlinia* | lowland forest | 10 |  | 16 | Africa | ([Simon et al., 2009](#_ENREF_35)) | Paraphyletic, west African rainforest |
| Caesalpinoid | lowland forest | 29.2⁺₋1.2 |  | 200 | South America | ([Lavin et al., 2005](#_ENREF_23)) | *Brachystegia* and *Colopho*-*spermum* radiated later in savanna. |
| Caricaceae | lowland forest | 51 (35-67) |  | 2 | Africa | ([Carvalho and Renner, 2012](#_ENREF_10)) | submontane rainforest in Africa, parallels to *Dorstenia* |
| *Coccinia* | lowland forest | 13.5 |  | 13 | Asia | ([Holstein and Renner, 2011](#_ENREF_18)) |  |
| *Dorstenia* | lowland forest | 112.3 (84.8-132) |  | 60 | Africa | ([Misiewicz and Zerega, 2012](#_ENREF_28)) | No dates for the shift to Socotra and the arid habitats. |
| Mimosoideae | lowland forest | 59.5 (58-61.8) |  |  | Africa | ([Bouchenak-Khelladi et al., 2010](#_ENREF_5)) | Complex pattern of dispersals between Africa and South America |
| Sapotaceae | lowland forest | 77.8 (72.9-82.7) |  | 302 | AsiaTrop | ([Bartish et al., 2010](#_ENREF_3)) | Ancestral node of family African |
| *Acridocarpus* | Savanna | 20 (17-23) |  | 5 | Africa | ([Davis et al., 2002](#_ENREF_13)) | Embedded in rainforest lineage |
| *Brachystegia* | Savanna | 10.01 |  | 46 | Africa | ([Simon et al., 2009](#_ENREF_35)) | Crown of whole genus, so savanna a bit younger. Embedded in an African clade |
| *Cayratia* | Savanna | 23.2 (11.4-38.0) |  | 7 | Asia | ([Lu et al., 2013](#_ENREF_26)) | Assignment dubious |
| *Coccinia* | Savanna | 8 |  | 9 | Africa | ([Holstein and Renner, 2011](#_ENREF_18)) | Derived from rainforest |
| *Crotalaria* | Savanna | 13.7 | 27.5 | 628 | Africa | ([Simon et al., 2009](#_ENREF_35)) |  |
| *Isoberlinia* | Savanna | 2.3 |  | 9 | Africa | ([Simon et al., 2009](#_ENREF_35)) | Deciduous woodland, the sister is *Englerodendron* from Tanzanian rainforest |
| *Senegalia* | Savanna | 10 | 20 | 66 | South America | ([Bouchenak-Khelladi et al., 2010](#_ENREF_5)) | Species numbers from [Kyalangalilwa et al. (2013)](#_ENREF_22), but not counting infraspecific taxa |
| Tecophilaeaceae | Savanna | 67 |  | 4 | South America | ([Buerki et al., 2013](#_ENREF_7)) | Inclusion of this datapoint causes havoc. |
| *Vachellia* | Savanna | 16.7 (13.5-23.3) | 37 | 77 | Africa | ([Bouchenak-Khelladi et al., 2010](#_ENREF_5)) | Species numbers from [Kyalangalilwa et al. (2013)](#_ENREF_22), but not counting infraspecific taxa |
| *Arabis alpina* | tropic-alpine | 0.5 |  | 1 | Eurasia | ([Koch et al., 2006](#_ENREF_21)) |  |
| Danthonioidaea | tropic-alpine | 5 |  | 5 | Africa | ([Linder et al., 2013](#_ENREF_24)) | Estimated |
| *Hypericum* (montane radiations) | tropic-alpine | 4.0 (1.7-7.9) | 20 | 20 | Eurasia | ([Meseguer et al., 2013](#_ENREF_27)) | At upper tree limit, almost alpine, numbers estimated |
| *Lobelia* Gaint | tropic-alpine | 11 | 24.5 | 15 | Africa | ([Antonelli, 2009](#_ENREF_1)) | Lobelioideae African in origin, Montane. |
| *Hypericum* (general African) | tropic-montane | 20 |  | 15 | Eurasia | ([Meseguer et al., 2013](#_ENREF_27)) | Montane grassland |
| *Impatiens* | tropic-montane | 5 |  | 109 | Asia | ([Janssens et al., 2009](#_ENREF_19)) | Montane moist forest, it does not get into the Cape |
| *Saintpaulia* | tropic-montane | 21.9 (11.2-34.0) |  | 20 | Africa | ([Moller and Cronk, 1997](#_ENREF_29)) | Embedded in *Streptocarpus*, which is then obviously older. |

References

Antonelli, A. (2009). Have giant lobelias evolved several times independently? Life form shifts and historical biogeography of the cosmopolitan and highly diverse subfamily Lobelioideae (Campanulaceae). *Bmc Biology* 7. doi: 10.1186/1741-7007-7-82.

Bakker, F.T., Culham, A., Marais, E., and Gibby, M. (2005). "Nested radiation in Cape *Pelargonium*," in *Plant Species-Level Systematics: new Perspectives on Pattern & Process,* eds. F.T. Bakker, L.W. Chatrou, B. Gravendeel & P.B. Pelser. (Königstein: Koeltz), 75-100.

Bartish, I.V., Antonelli, A., Richardson, J.E., and Swenson, U. (2010). Vicariance or long-distance dispersal: historical biogeography of the pantropical subfamily Chrysophylloideae (Sapotaceae). *Journal of Biogeography***,** no-no. doi: 10.1111/j.1365-2699.2010.02389.x.

Bellstedt, D.U., Galley, C., Pirie, M.D., and Linder, H.P. (2012). The migration of the palaeotropical arid flora: Zygophylloideae as an example. *Systematic Botany* 37**,** 951-959. doi: 10.1600/036364412x656608.

Bouchenak-Khelladi, Y., Maurin, O., Hurter, J., and Van Der Bank, M. (2010). The evolutionary history and biogeography of Mimosoideae (Leguminosae): An emphasis on African acacias. *Molecular Phylogenetics and Evolution* 57**,** 495-508. doi: 10.1016/j.ympev.2010.07.019.

Bruyns, P.V., Klak, C., and Hanek, P. (2011). Age and diversity in Old World succulent species of *Euphorbia* (Euphorbiaceae). *Taxon* 60**,** 1717-1733.

Buerki, S., Manning, J.C., and Forest, F. (2013). Spatio-temporal history of the disjunct family Tecophilaeaceae: a tale involving the colonization of three Mediterranean-type ecosystems. *Annals of Botany* 111**,** 361-373. doi: 10.1093/aob/mcs286.

Bytebier, B., Antonelli, A., Bellstedt, D.U., and Linder, H.P. (2010). Estimating the age of fire in the Cape flora of South Africa from an orchid phylogeny. *Proceedings of the Royal Society B: Biological Sciences* 278**,** 188-195.

Carlson, S.E., Linder, H.P., and Donoghue, M.J. (2012). The historical biogeography of *Scabiosa* (Dipsacaceae): implications for Old World plant disjunctions. *Journal of Biogeography* 39**,** 1086-1100. doi: 10.1111/j.1365-2699.2011.02669.x.

Carvalho, F.A., and Renner, S.S. (2012). A dated phylogeny of the papaya family (Caricaceae) reveals the crop's closest relatives and the family's biogeographic history. *Molecular Phylogenetics and Evolution* 65**,** 46-53. doi: 10.1016/j.ympev.2012.05.019.

Couvreur, T.L.P., Franzke, A., Al-Shehbaz, I.A., Bakker, F.T., Koch, M.A., and Mummenhoff, K. (2010). Molecular phylogenetics, temporal diversification, and principles of evolution in the mustard family (Brassicaceae). *Molecular Biology and Evolution* 27**,** 55-71. doi: 10.1093/molbev/msp202.

Couvreur, T.L.P., Pirie, M.D., Chatrou, L.W., Saunders, R.M.K., Su, Y.C.F., Richardson, J.E., and Erkens, R.H.J. (2011). Early evolutionary history of the flowering plant family Annonaceae: steady diversification and boreotropical geodispersal. *Journal of Biogeography* 38**,** 664-680. doi: 10.1111/j.1365-2699.2010.02434.x.

Davis, C.C., Bell, C.D., Fritsch, P.W., and Mathews, S. (2002). Phylogeny of *Acridocarpus-Brachylophon* (Malpighiaceae): implications for tertiary tropical floras and Afroasian biogeography. *Evolution* 56**,** 2395-2405.

Forest, F., Nänni, I., Chase, M.W., Crane, P.R., and Hawkins, J.A. (2007). Diversification of a large genus in a continental biodiversity hotspot: temporal and spatial origin of *Muraltia* (Polygalaceae) in the Cape of South Africa. *Molecular Phylogenetics and Evolution* 43**,** 60-74.

Goldblatt, P., and Manning, J.C. (2008). *The Iris family. Natural history and classification.* Portland: Timber Press.

Goldblatt, P., Rodriguez, A., Powell, M.P., Davies, T.J., Manning, J.C., Van Der Bank, M., and Savolainen, V. (2008). Iridaceae 'out of Australasia'? Phylogeny, biogeography, and divergence time based on plastid DNA sequences. *Systematic Botany* 33**,** 495-508. doi: 10.1600/036364408785679806.

Hardy, C.R., Moline, P.M., and Linder, H.P. (2008). A phylogeny for the African Restionaceae, and new perspectives on morphology's role in generating complete species-level phylogenies for large clades. *International Journal of Plant Science* 169**,** 377-390.

Holstein, N., and Renner, S.S. (2011). A dated phylogeny and collection records reveal repeated biome shifts in the African genus *Coccinia* (Cucurbitaceae). *Bmc Evolutionary Biology* 11. doi: 10.1186/1471-2148-11-28.

Janssens, S.B., Knox, E.B., Huysmans, S., Smets, E.F., and Merckx, V.S.F.T. (2009). Rapid radiation of *Impatiens* (Balsaminaceae) during Pliocene and Pleistocene: Result of a global climate change. *Molecular Phylogenetics and Evolution* 52**,** 806-824. doi: 10.1016/j.ympev.2009.04.013.

Klak, C., Reeves, G., and Hedderson, T.A. (2004). Unmatched tempo of evolution in Southern African semi-desert ice plants. *Nature* 427**,** 63-65.

Koch, M.A., Kiefer, C., Ehrich, D., Vogel, J., Brochmann, C., and Mummenhoff, K. (2006). Three times out of Asia Minor: the phylogeography of *Arabis alpina* L. (Brassicaceae). *Molecular Ecology* 15**,** 825-839.

Kyalangalilwa, B., Boatwright, J.S., Daru, B.H., Maurin, O., and Van Der Bank, M. (2013). Phylogenetic position and revised classification of *Acacia* s.l. (Fabaceae: Mimosoideae) in Africa, including new combinations in *Vachellia* and *Senegalia*. *Botanical Journal of the Linnean Society* 172**,** 500-523. doi: 10.1111/boj.12047.

Lavin, M., Herendeen, P.S., and Wojciechowski, M.F. (2005). Evolutionary rates analysis of Leguminosae implicates a rapid diversification of lineages during the tertiary. *Systematic Biology* 54**,** 575-594.

Linder, H.P., Antonelli, A., Humphreys, A.M., Pirie, M.D., and Wüest, R.O. (2013). What determines biogeographical ranges? Historical wanderings and ecological constraints in the danthonioid grasses. *Journal of Biogeography* 40**,** 821-834. doi: 10.1111/jbi.12070.

Linder, H.P., Dlamini, T., Henning, J., and Verboom, G.A. (2006). The evolutionary history of *Melianthus* (Melianthaceae). *American Journal of Botany* 93**,** 1052-1064.

Lu, L., Wang, W., Chen, Z., and Wen, J. (2013). Phylogeny of the non-monophyletic *Cayratia* Juss. (Vitaceae) and implications for character evolution and biogeography. *Molecular Phylogenetics and Evolution* 68**,** 502-515. doi: <http://dx.doi.org/10.1016/j.ympev.2013.04.023>.

Meseguer, A.S., Aldasoro, J.J., and Sanmartín, I. (2013). Bayesian inference of phylogeny, morphology and range evolution reveals a complex evolutionary history in St. John’s wort (*Hypericum*). *Molecular Phylogenetics and Evolution* 67**,** 379-403. doi: <http://dx.doi.org/10.1016/j.ympev.2013.02.007>.

Misiewicz, T.M., and Zerega, N.C. (2012). Phylogeny, biogeography and characters evolution of *Dorstenia* (Moraceae). *Edinburgh Journal of Botany* 69**,** 413-440. doi: 10.1017/s096042861200025x.

Moller, M., and Cronk, Q.C.B. (1997). Origin and relationships of *Saintpaulia* (Gesneriaceae) based on ribosomal DNA internal transcribed spacer (ITS) sequences. *American Journal of Botany* 84**,** 956-965. doi: 10.2307/2446286.

Mummenhoff, K., Al-Shehbaz, I.A., Bakker, F.T., Linder, H.P., and Mühlhausen, A. (2005). Phylogeny, morphological evolution, and speciation of endemic Brassicaceae genera in the Cape flora of Southern Africa. *Annals of the Missouri Botanical Garden* 92**,** 400-424.

Prebble, J.M., Cupido, C.N., Meudt, H.M., and Garnock-Jones, P.J. (2011). First phylogenetic and biogeographical study of the southern bluebells (*Wahlenbergia*, Campanulaceae). *Molecular Phylogenetics and Evolution* 59**,** 636-648.

Ramirez, S.R., Gravendeel, B., Singer, R.B., Marshall, C.R., and Pierce, N.E. (2007). Dating the origin of the Orchidaceae from a fossil orchid with its pollinator. *Nature* 448**,** 1042-1045.

Sauquet, H., Weston, P.H., Barker, N.P., Anderson, C.L., Cantrill, D.J., and Savolainen, V. (2009). Using fossils and molecular data to reveal the origins of the Cape proteas (subfamily Proteoideae). *Molecular Phylogenetics and Evolution* 51**,** 31-43.

Schrire, B.D., Lavin, M., Barker, N.P., Cortes-Burns, H., Von Senger, I., and Kim, J. (2003). "Towards a phylogeny of *Indigofera* (Leguminosae-Papilionoideae): indentification of major clades and relative ages," in *Advances in Legume Systematics, Part 10, Higher Level Systematics,* eds. B.B. Klitgaard & A. Bruneau. (Kew: Royal Botanic Gardens), 269-302.

Simon, M.F., Grether, R., De Queiroz, L.P., Skema, C., Pennington, R.T., and Hughes, C.E. (2009). Recent assembly of the Cerrado, a neotropical plant diversity hotspot, by in situ evolution of adaptations to fire. *Proceedings of the National Academy of Sciences of the United States of America* 106**,** 20359-20364. doi: 10.1073/pnas.0903410106.

Thiv, M., Van Der Niet, T., Rutschmann, F., Thulin, M., Brune, T., and Linder, H.P. (2011). Old-New World and trans-African disjunctions of *Thamnosma* (Rutaceae): intercontinental long-distance dispersal and local differentiation in the succulent biome. *American Journal of Botany* 98**,** 76-87. doi: 10.3732/ajb.1000339.

Thomas, D.C., Hughes, M., Phutthai, T., Ardi, W.H., Rajbhandary, S., Rubite, R., Twyford, A.D., and Richardson, J.E. (2012). West to east dispersal and subsequent rapid diversification of the mega-diverse genus *Begonia* (Begoniaceae) in the Malesian archipelago. *Journal of Biogeography* 39**,** 98-113. doi: 10.1111/j.1365-2699.2011.02596.x.

Thulin, M., Lavin, M., Pasquet, R., and Delgado-Salinas, A. (2004). Phylogeny and biogeography of *Wafira* (Leguminosae): A monophyletic segregate of Vigna centered in the horn of Africa region. *Systematic Botany* 29**,** 903-920. doi: 10.1600/0363644042451035.

Van Der Niet, T., Linder, H.P., Bytebier, B., and Bellstedt, D.U. (2005). Molecular markers reject the monophyly of the subgenera of *Satyrium* (Orchidaceae). *Systematic Botany* 30**,** 263-274.

Verboom, G.A., Archibald, J.K., Bakker, F.T., Bellstedt, D.U., Conrad, F., Dreyer, L.L., Forest, F., Galley, C., Goldblatt, P., Henning, J.F., Mummenhoff, K., Linder, H.P., Muasya, A.M., Oberlander, K.C., Savolainen, V., Snijman, D.A., Van Der Niet, T., and Nowell, T.L. (2009). Origin and diversification of the Greater Cape flora: Ancient species repository, hot-bed of recent radiation, or both? *Molecular Phylogenetics and Evolution* 51**,** 44-53. doi: 10.1016/j.ympev.2008.01.037.

Verboom, G.A., Linder, H.P., and Stock, W.D. (2003). Phylogenetics of the grass genus *Ehrharta* Thunb.: evidence for radiation in the summer-arid zone of the South African Cape. *Evolution* 57**,** 1008-1021.

Weeks, A., and Simpson, B.B. (2007). Molecular phylogenetic analysis of *Commiphora* (Burseraceae) yields insight on the evolution and historical biogeography of an "impossible" genus. *Molecular Phylogenetics and Evolution* 42**,** 62-79.
